# Supplementary material
Source: Springer Nature journal article supplement (https://www.springermedizin.de/resource/supplementary/13054_2011_9560_MOESM3_ESM.pdf/9706458)

a

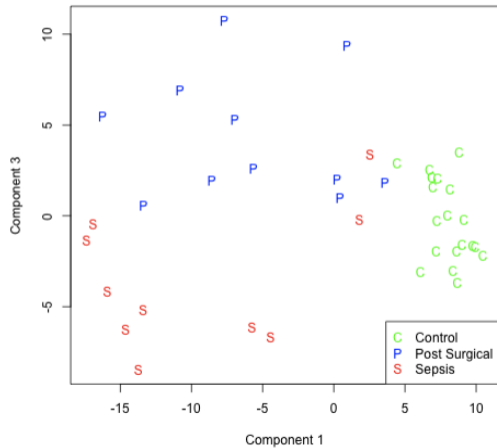

b

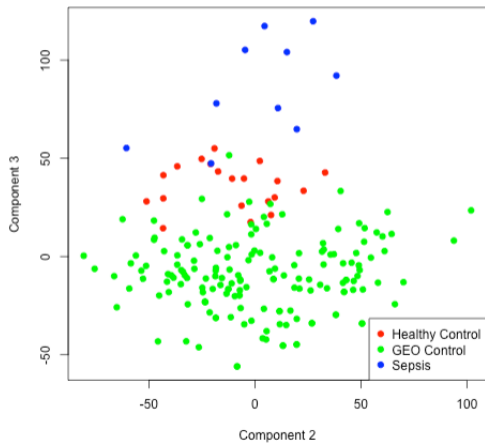

Supplement: MOESM3 [file 9706458]
